# Supplementary material for: Preparation of Porous Liquid based on Silicalite-1
Source: Preprints.org preprint supplement (doi:10.20944/preprints201911.0181.v1), 2019-11-15
Supplement: Supplementary file 1 [file supplementary]

Supplementary Materials

## Preparation of Porous Liquid based on Silicalite-1

Yutong Liu <sup>1,2</sup>, Yang Bai <sup>1</sup> and Tao Tian <sup>1,\*</sup>

<sup>1</sup> Key Laboratory of Groundwater Resources and Environment, Ministry of Education, College of Environment and Resource, Jilin University, Changchun 130012, China; tiantao@jlu.edu.cn

<sup>2</sup> Jilin Engineering Normal University; liuyt841011@163.com

\* Correspondence: tiantao@jlu.edu.cn

Received: date; Accepted: date; Published: date

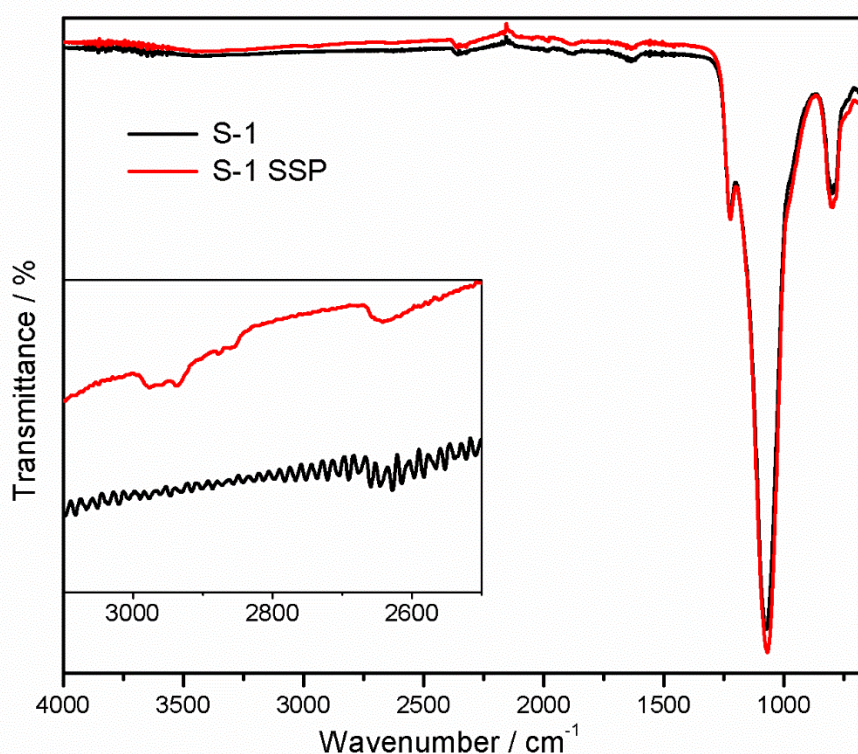

**Figure S1.** FT-IR spectra of S-1 and S-1 treated by SSP.

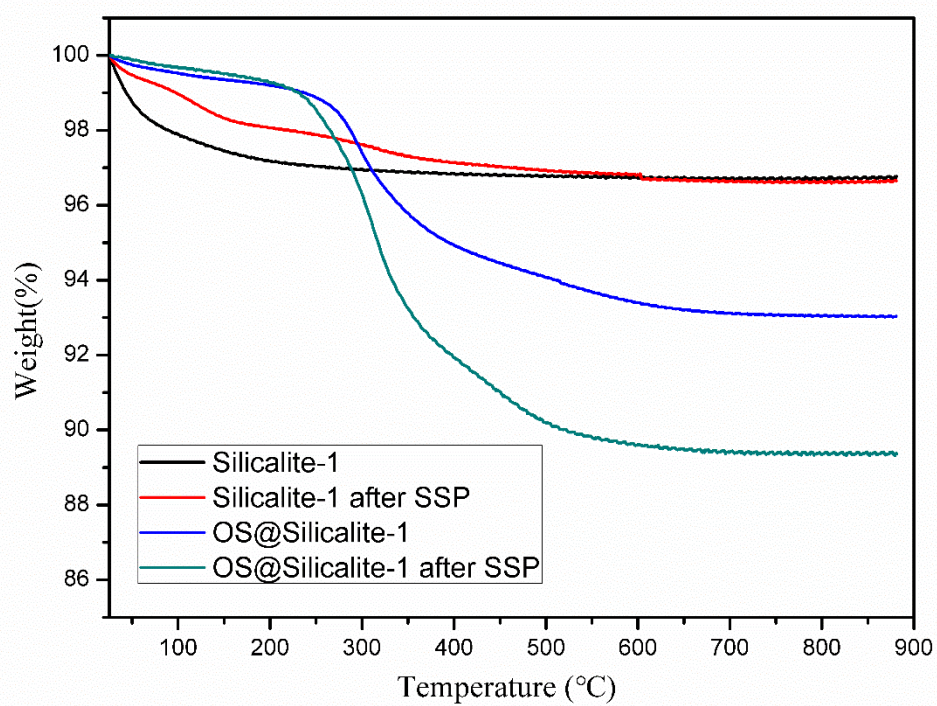

**Figure S2.** TGA trace of S-1, S-1 after SSP, OS@S-1 and OS@S-1 after SSP.
